# Supplementary material for: Identifying gene expression profiles associated with neurogenesis and inflammation in the human subependymal zone from development through aging
Source: PubMed Central journal article supplement (PMC8742079; doi:10.1038/s41598-021-03976-4), 2022-01-07
Supplement: 41598_2021_3976_MOESM2_ESM.pdf [file 41598_2021_3976_MOESM2_ESM.pdf]

|                 |         |                |
|-----------------|---------|----------------|
| ENSG00000009694 | TENM1   | protein_coding |
| ENSG00000011677 | GABRA3  | protein_coding |
| ENSG00000017427 | IGF1    | protein_coding |
| ENSG00000019505 | SYT13   | protein_coding |
| ENSG00000043355 | ZIC2    | protein_coding |
| ENSG00000044524 | EPHA3   | protein_coding |
| ENSG00000072832 | CRMP1   | protein_coding |
| ENSG00000074966 | TXK     | protein_coding |
| ENSG00000077279 | DCX     | protein_coding |
| ENSG00000081189 | MEF2C   | protein_coding |
| ENSG00000087237 | CETP    | protein_coding |
| ENSG00000099250 | NRP1    | protein_coding |
| ENSG00000101188 | NTSR1   | protein_coding |
| ENSG00000101204 | CHRNA4  | protein_coding |
| ENSG00000101255 | TRIB3   | protein_coding |
| ENSG00000101825 | MXRA5   | protein_coding |
| ENSG00000102302 | FGD1    | protein_coding |
| ENSG00000103546 | SLC6A2  | protein_coding |
| ENSG00000104435 | STMN2   | protein_coding |
| ENSG00000105327 | BBC3    | protein_coding |
| ENSG00000105808 | RASA4   | protein_coding |
| ENSG00000106852 | LHX6    | protein_coding |
| ENSG00000107105 | ELAVL2  | protein_coding |
| ENSG00000107165 | TYRP1   | protein_coding |
| ENSG00000108576 | SLC6A4  | protein_coding |
| ENSG00000108950 | FAM20A  | protein_coding |
| ENSG00000111846 | GCNT2   | protein_coding |
| ENSG00000112182 | BACH2   | protein_coding |
| ENSG00000113389 | NPR3    | protein_coding |
| ENSG00000113532 | ST8SIA4 | protein_coding |
| ENSG00000114631 | PODXL2  | protein_coding |
| ENSG00000115828 | QPCT    | protein_coding |
| ENSG00000116852 | KIF21B  | protein_coding |
| ENSG00000117009 | KMO     | protein_coding |
| ENSG00000117154 | IGSF21  | protein_coding |
| ENSG00000117632 | STMN1   | protein_coding |
| ENSG00000118495 | PLAGL1  | protein_coding |
| ENSG00000119714 | GPR68   | protein_coding |
| ENSG00000120875 | DUSP4   | protein_coding |
| ENSG00000121440 | PDZRN3  | protein_coding |
| ENSG00000122584 | NXPH1   | protein_coding |
| ENSG00000125170 | DOK4    | protein_coding |
| ENSG00000126010 | GRPR    | protein_coding |
| ENSG00000127325 | BEST3   | protein_coding |
| ENSG00000130167 | TSPAN16 | protein_coding |
| ENSG00000130300 | PLVAP   | protein_coding |

|                 |         |                       |
|-----------------|---------|-----------------------|
| ENSG00000130600 | H19     | processed_transcript  |
| ENSG00000132518 | GUCY2D  | protein_coding        |
| ENSG00000133107 | TRPC4   | protein_coding        |
| ENSG00000133216 | EPHB2   | protein_coding        |
| ENSG00000134247 | PTGFRN  | protein_coding        |
| ENSG00000134443 | GRP     | protein_coding        |
| ENSG00000135074 | ADAM19  | protein_coding        |
| ENSG00000137252 | HCRTR2  | protein_coding        |
| ENSG00000137267 | TUBB2A  | protein_coding        |
| ENSG00000140798 | ABCC12  | protein_coding        |
| ENSG00000140945 | CDH13   | protein_coding        |
| ENSG00000140988 | RPS2    | protein_coding        |
| ENSG00000141431 | ASXL3   | protein_coding        |
| ENSG00000141622 | RNF165  | protein_coding        |
| ENSG00000141753 | IGFBP4  | protein_coding        |
| ENSG00000142549 | IGLON5  | protein_coding        |
| ENSG00000143061 | IGSF3   | protein_coding        |
| ENSG00000144227 | NXPH2   | protein_coding        |
| ENSG00000144407 | PTH2R   | protein_coding        |
| ENSG00000144452 | ABCA12  | protein_coding        |
| ENSG00000144583 |         | Mar-04 protein_coding |
| ENSG00000144596 | GRIP2   | protein_coding        |
| ENSG00000144681 | STAC    | protein_coding        |
| ENSG00000145113 | MUC4    | protein_coding        |
| ENSG00000146374 | RSPO3   | protein_coding        |
| ENSG00000146410 | MTRFR2  | protein_coding        |
| ENSG00000146469 | VIP     | protein_coding        |
| ENSG00000147432 | CHRNA3  | protein_coding        |
| ENSG00000147571 | CRH     | protein_coding        |
| ENSG00000148680 | HTR7    | protein_coding        |
| ENSG00000149452 | SLC22A8 | protein_coding        |
| ENSG00000150594 | ADRA2A  | protein_coding        |
| ENSG00000152217 | SETBP1  | protein_coding        |
| ENSG00000152578 | GRIA4   | protein_coding        |
| ENSG00000152591 | DSPP    | protein_coding        |
| ENSG00000152953 | STK32B  | protein_coding        |
| ENSG00000154639 | CXADR   | protein_coding        |
| ENSG00000154764 | WNT7A   | protein_coding        |
| ENSG00000155858 | LSM11   | protein_coding        |
| ENSG00000155966 | AFF2    | protein_coding        |
| ENSG00000156574 | NODAL   | protein_coding        |
| ENSG00000156687 | UNC5D   | protein_coding        |
| ENSG00000157542 | KCNJ6   | protein_coding        |
| ENSG00000158089 | GALNT14 | protein_coding        |
| ENSG00000162636 | FAM102B | protein_coding        |
| ENSG00000162670 | BRINP3  | protein_coding        |

|                 |          |                                    |
|-----------------|----------|------------------------------------|
| ENSG00000162849 | KIF26B   | protein_coding                     |
| ENSG00000163171 | CDC42EP3 | protein_coding                     |
| ENSG00000163359 | COL6A3   | protein_coding                     |
| ENSG00000163449 | TMEM169  | protein_coding                     |
| ENSG00000164684 | ZNF704   | protein_coding                     |
| ENSG00000165379 | LRFN5    | protein_coding                     |
| ENSG00000165434 | PGM2L1   | protein_coding                     |
| ENSG00000165474 | GJB2     | protein_coding                     |
| ENSG00000165553 | NGB      | protein_coding                     |
| ENSG00000165644 | COMTD1   | protein_coding                     |
| ENSG00000165973 | NELL1    | protein_coding                     |
| ENSG00000166006 | KCNC2    | protein_coding                     |
| ENSG00000166148 | AVPR1A   | protein_coding                     |
| ENSG00000166250 | CLMP     | protein_coding                     |
| ENSG00000167103 | PIP5KL1  | protein_coding                     |
| ENSG00000167244 | IGF2     | protein_coding                     |
| ENSG00000167332 | OR51E2   | protein_coding                     |
| ENSG00000167754 | KLK5     | protein_coding                     |
| ENSG00000168079 | SCARA5   | protein_coding                     |
| ENSG00000168081 | PNOC     | protein_coding                     |
| ENSG00000168546 | GFRA2    | protein_coding                     |
| ENSG00000168772 | CXXC4    | protein_coding                     |
| ENSG00000169213 | RAB3B    | protein_coding                     |
| ENSG00000169258 | GPRIN1   | protein_coding                     |
| ENSG00000169427 | KCNK9    | protein_coding                     |
| ENSG00000169750 | RAC3     | protein_coding                     |
| ENSG00000170873 | MTSS1    | protein_coding                     |
| ENSG00000170893 | TRH      | protein_coding                     |
| ENSG00000171124 | FUT3     | protein_coding                     |
| ENSG00000171243 | SOSTDC1  | protein_coding                     |
| ENSG00000171345 | KRT19    | protein_coding                     |
| ENSG00000172137 | CALB2    | protein_coding                     |
| ENSG00000172159 | FRMD3    | protein_coding                     |
| ENSG00000172497 | ACOT12   | protein_coding                     |
| ENSG00000172901 | AQPEP    | protein_coding                     |
| ENSG00000173166 | RAPH1    | protein_coding                     |
| ENSG00000173406 | DAB1     | protein_coding                     |
| ENSG00000174453 | VWC2L    | protein_coding                     |
| ENSG00000174482 | LINGO2   | protein_coding                     |
| ENSG00000175513 | TSGA10IP | protein_coding                     |
| ENSG00000176788 | BASP1    | protein_coding                     |
| ENSG00000177875 | CCDC184  | protein_coding                     |
| ENSG00000178162 | FAR2P2   | transcribed_unprocessed_pseudogene |
| ENSG00000178723 | GLULP4   | processed_pseudogene               |
| ENSG00000180438 | TPRXL    | protein_coding                     |
| ENSG00000180535 | BHLHA15  | protein_coding                     |

|                 |              |                                  |
|-----------------|--------------|----------------------------------|
| ENSG00000180611 | MB21D2       | protein_coding                   |
| ENSG00000180828 | BHLHE22      | protein_coding                   |
| ENSG00000182348 | ZNF804B      | protein_coding                   |
| ENSG00000182631 | RXFP3        | protein_coding                   |
| ENSG00000183662 | FAM19A1      | protein_coding                   |
| ENSG00000184261 | KCNK12       | protein_coding                   |
| ENSG00000185305 | ARL15        | protein_coding                   |
| ENSG00000185338 | SOCS1        | protein_coding                   |
| ENSG00000186007 | LEMD1        | protein_coding                   |
| ENSG00000187889 | C1orf168     | protein_coding                   |
| ENSG00000188386 | PPP3R2       | protein_coding                   |
| ENSG00000188730 | VWC2         | protein_coding                   |
| ENSG00000189159 | HN1          | protein_coding                   |
| ENSG00000196628 | TCF4         | protein_coding                   |
| ENSG00000197177 | GPR123       | protein_coding                   |
| ENSG00000197705 | KLHL14       | protein_coding                   |
| ENSG00000198673 | FAM19A2      | protein_coding                   |
| ENSG00000198759 | EGFL6        | protein_coding                   |
| ENSG00000201643 | SNORA14A     | snoRNA                           |
| ENSG00000203668 | CHML         | protein_coding                   |
| ENSG00000203760 | CENPW        | protein_coding                   |
| ENSG00000204764 | RANBP17      | protein_coding                   |
| ENSG00000204963 | PCDHA7       | protein_coding                   |
| ENSG00000205581 | HMGN1        | protein_coding                   |
| ENSG00000206579 | XKR4         | protein_coding                   |
| ENSG00000213553 | RPLP0P6      | processed_pseudogene             |
| ENSG00000214376 | VSTM5        | protein_coding                   |
| ENSG00000215475 | SIAH3        | protein_coding                   |
| ENSG00000217236 | SP9          | protein_coding                   |
| ENSG00000223910 | ZNF32-AS3    | antisense                        |
| ENSG00000224020 | MIR181A2HG   | antisense                        |
| ENSG00000224223 | VSTM2A-OT1   | sense_overlapping                |
| ENSG00000225206 | MIR137HG     | lincRNA                          |
| ENSG00000225649 | AC064875.2   | processed_transcript             |
| ENSG00000226567 | LINC00606    | lincRNA                          |
| ENSG00000226683 | PWWP2AP1     | processed_pseudogene             |
| ENSG00000227267 | RP11-305O4.2 | processed_pseudogene             |
| ENSG00000227382 | EIF4A2P2     | processed_pseudogene             |
| ENSG00000228663 | PSMD10P1     | processed_pseudogene             |
| ENSG00000228817 | BACH1-IT2    | lincRNA                          |
| ENSG00000229153 | EPHA1-AS1    | antisense                        |
| ENSG00000229656 | RP11-462L8.1 | lincRNA                          |
| ENSG00000230397 | SPTLC1P1     | transcribed_processed_pseudogene |
| ENSG00000231011 | RP11-494I9.1 | processed_pseudogene             |
| ENSG00000231121 | RP1-34H18.1  | lincRNA                          |
| ENSG00000231764 | DLX6-AS1     | antisense                        |

|                 |                |                                    |
|-----------------|----------------|------------------------------------|
| ENSG00000233093 | LINC00892      | processed_transcript               |
| ENSG00000233860 | RP11-359D14.2  | antisense                          |
| ENSG00000235447 | TRAPPC13P1     | processed_pseudogene               |
| ENSG00000236120 | RP11-733O18.1  | lincRNA                            |
| ENSG00000236166 | RP3-523C21.2   | lincRNA                            |
| ENSG00000237015 | CTA-984G1.5    | antisense                          |
| ENSG00000237596 | RP13-143G15.4  | antisense                          |
| ENSG00000239468 | RN7SL569P      | misc_RNA                           |
| ENSG00000239959 | ENPP7P2        | unprocessed_pseudogene             |
| ENSG00000240342 | RPS2P5         | processed_pseudogene               |
| ENSG00000240801 | AC132217.4     | 3prime_overlapping_ncrna           |
| ENSG00000240891 | PLCXD2         | protein_coding                     |
| ENSG00000240929 | HIST2H2BB      | transcribed_unprocessed_pseudogene |
| ENSG00000241098 | FLJ46066       | lincRNA                            |
| ENSG00000241155 | ARHGAP31-AS1   | antisense                          |
| ENSG00000241933 | RP11-755B10.3  | lincRNA                            |
| ENSG00000242419 | PCDHGC4        | protein_coding                     |
| ENSG00000245156 | RP11-867G23.3  | lincRNA                            |
| ENSG00000248479 | RP11-807H7.2   | lincRNA                            |
| ENSG00000248708 | CTD-2316B1.2   | lincRNA                            |
| ENSG00000248927 | CTD-2334D19.1  | lincRNA                            |
| ENSG00000250896 | RNPS1P1        | processed_pseudogene               |
| ENSG00000253213 | RP11-546B8.3   | processed_pseudogene               |
| ENSG00000253389 | RP11-930P14.1  | antisense                          |
| ENSG00000253457 | SMIM18         | protein_coding                     |
| ENSG00000253966 | CTC-455F18.3   | processed_pseudogene               |
| ENSG00000254305 | MRPL9P1        | transcribed_processed_pseudogene   |
| ENSG00000255403 | AP000641.1     | processed_pseudogene               |
| ENSG00000255408 | PCDHA3         | protein_coding                     |
| ENSG00000255547 | RPA2P3         | processed_pseudogene               |
| ENSG00000256925 | GPR123-AS1     | antisense                          |
| ENSG00000257501 | RP11-1016B18.1 | transcribed_processed_pseudogene   |
| ENSG00000257880 | RP11-769N19.2  | sense_intronic                     |
| ENSG00000258357 | RP11-778J16.2  | processed_pseudogene               |
| ENSG00000258419 | RP11-588P7.1   | sense_intronic                     |
| ENSG00000258947 | TUBB3          | protein_coding                     |
| ENSG00000259871 | CTA-363E6.1    | sense_intronic                     |
| ENSG00000259957 | RP11-491F9.8   | lincRNA                            |
| ENSG00000260317 | RP11-48B3.4    | lincRNA                            |
| ENSG00000260412 | RP11-438B23.2  | sense_overlapping                  |
| ENSG00000260903 | XKR7           | protein_coding                     |
| ENSG00000261183 | RP11-532F12.5  | antisense                          |
| ENSG00000261888 | AC144831.1     | lincRNA                            |
| ENSG00000264058 | KRT222         | protein_coding                     |
| ENSG00000264885 | RP11-815I9.4   | sense_intronic                     |
| ENSG00000266588 | RP1-56K13.5    | lincRNA                            |

|                 |                |                      |
|-----------------|----------------|----------------------|
| ENSG00000266923 | RP11-693J15.4  | antisense            |
| ENSG00000267278 | MAP3K14-AS1    | antisense            |
| ENSG00000267534 | S1PR2          | protein_coding       |
| ENSG00000267764 | RP11-484L8.1   | antisense            |
| ENSG00000267868 | RP11-120K24.3  | lincRNA              |
| ENSG00000268051 | CTC-244M17.1   | sense_intronic       |
| ENSG00000269867 | CTD-2583A14.8  | sense_intronic       |
| ENSG00000270059 | RP11-88H12.2   | sense_intronic       |
| ENSG00000270670 | RP11-248C1.3   | processed_pseudogene |
| ENSG00000271892 | CTD-2228A4.1   | lincRNA              |
| ENSG00000271904 | CTC-498M16.4   | lincRNA              |
| ENSG00000272627 | RP11-354E23.5  | sense_intronic       |
| ENSG00000272689 | RP4-539M6.21   | sense_intronic       |
| ENSG00000272717 | RP11-342I1.2   | antisense            |
| ENSG00000273399 | RP11-408A13.3  | lincRNA              |
| ENSG00000273447 | AC004067.5     | antisense            |
| ENSG00000273786 | RP11-133K1.11  | sense_intronic       |
| ENSG00000273853 | RP11-438D14.3  | sense_intronic       |
| ENSG00000276180 | HIST1H4I       | protein_coding       |
| ENSG00000276261 | RP11-1060J15.9 | antisense            |
| ENSG00000276449 | AC004076.5     | antisense            |
| ENSG00000276740 | RP11-381O6.1   | sense_intronic       |
| ENSG00000277182 | CTB-58E17.5    | antisense            |
| ENSG00000277954 | RP11-679B19.1  | antisense            |
| ENSG00000278532 | RP11-17E3.1    | lincRNA              |
| ENSG00000278934 | CTD-2006M22.2  | TEC                  |
| ENSG00000279030 | RP11-212I21.3  | TEC                  |
| ENSG00000279206 | RP5-991G20.6   | lincRNA              |
| ENSG00000279551 | RP11-588G21.1  | TEC                  |
| ENSG00000279601 | CTA-38K21.2    | TEC                  |
| ENSG00000279665 | RP11-507J18.5  | TEC                  |
| ENSG00000280048 | RP11-327J17.7  | TEC                  |
| ENSG00000280184 | AL023806.1     | protein_coding       |
| ENSG00000280304 | CTD-2536I1.2   | TEC                  |
