# Supplementary material for: Identifying gene expression profiles associated with neurogenesis and inflammation in the human subependymal zone from development through aging
Source: PubMed Central journal article supplement (PMC8742079; doi:10.1038/s41598-021-03976-4), 2022-01-07
Supplement: 41598_2021_3976_MOESM3_ESM.pdf [file 41598_2021_3976_MOESM3_ESM.pdf]

|                 |          |                    |
|-----------------|----------|--------------------|
| ENSG00000000971 | CFH      | protein_coding     |
| ENSG00000003989 | SLC7A2   | protein_coding     |
| ENSG00000004660 | CAMKK1   | protein_coding     |
| ENSG00000005020 | SKAP2    | protein_coding     |
| ENSG00000005882 | PDK2     | protein_coding     |
| ENSG00000005981 | ASB4     | protein_coding     |
| ENSG00000006555 | TTC22    | protein_coding     |
| ENSG00000006747 | SCIN     | protein_coding     |
| ENSG00000008118 | CAMK1G   | protein_coding     |
| ENSG00000008394 | MGST1    | protein_coding     |
| ENSG00000010282 | HHATL    | protein_coding     |
| ENSG00000010404 | IDS      | protein_coding     |
| ENSG00000011600 | TYROBP   | protein_coding     |
| ENSG00000013563 | DNASE1L1 | protein_coding     |
| ENSG00000019582 | CD74     | protein_coding     |
| ENSG00000020129 | NCDN     | protein_coding     |
| ENSG00000020633 | RUNX3    | protein_coding     |
| ENSG00000022567 | SLC45A4  | protein_coding     |
| ENSG00000034971 | MYOC     | protein_coding     |
| ENSG00000043143 | JADE2    | protein_coding     |
| ENSG00000047579 | DTNBP1   | protein_coding     |
| ENSG00000053108 | FSTL4    | protein_coding     |
| ENSG00000053524 | MCF2L2   | protein_coding     |
| ENSG00000055732 | MCOLN3   | protein_coding     |
| ENSG00000058085 | LAMC2    | protein_coding     |
| ENSG00000062524 | LTK      | protein_coding     |
| ENSG00000065325 | GLP2R    | protein_coding     |
| ENSG00000065357 | DGKA     | protein_coding     |
| ENSG00000065618 | COL17A1  | protein_coding     |
| ENSG00000065923 | SLC9A7   | protein_coding     |
| ENSG00000069424 | KCNAB2   | protein_coding     |
| ENSG00000070404 | FSTL3    | protein_coding     |
| ENSG00000071967 | CYBRD1   | protein_coding     |
| ENSG00000072110 | ACTN1    | protein_coding     |
| ENSG00000073331 | ALPK1    | protein_coding     |
| ENSG00000074276 | CDHR2    | protein_coding     |
| ENSG00000080200 | CRYBG3   | protein_coding     |
| ENSG00000081237 | PTPRC    | protein_coding     |
| ENSG00000081277 | PKP1     | protein_coding     |
| ENSG00000082175 | PGR      | protein_coding     |
| ENSG00000085831 | TTC39A   | protein_coding     |
| ENSG00000086991 | NOX4     | protein_coding     |
| ENSG00000087086 | FTL      | protein_coding     |
| ENSG00000087250 | MT3      | protein_coding     |
| ENSG00000087842 | PIR      | protein_coding     |
| ENSG00000088340 | FER1L4   | unitary_pseudogene |

|                 |          |                |
|-----------------|----------|----------------|
| ENSG00000088836 | SLC4A11  | protein_coding |
| ENSG00000089327 | FXYD5    | protein_coding |
| ENSG00000095203 | EPB41L4B | protein_coding |
| ENSG00000095932 | SMIM24   | protein_coding |
| ENSG00000099308 | MAST3    | protein_coding |
| ENSG00000099937 | SERPIND1 | protein_coding |
| ENSG00000100181 | TPTEP1   | lincRNA        |
| ENSG00000100206 | DMC1     | protein_coding |
| ENSG00000100242 | SUN2     | protein_coding |
| ENSG00000100285 | NEFH     | protein_coding |
| ENSG00000100307 | CBX7     | protein_coding |
| ENSG00000100341 | PNPLA5   | protein_coding |
| ENSG00000100714 | MTHFD1   | protein_coding |
| ENSG00000101082 | SLA2     | protein_coding |
| ENSG00000101298 | SNPH     | protein_coding |
| ENSG00000101470 | TNNC2    | protein_coding |
| ENSG00000101850 | GPR143   | protein_coding |
| ENSG00000102554 | KLF5     | protein_coding |
| ENSG00000102882 | MAPK3    | protein_coding |
| ENSG00000104213 | PDGFRL   | protein_coding |
| ENSG00000104369 | JPH1     | protein_coding |
| ENSG00000104783 | KCNN4    | protein_coding |
| ENSG00000105662 | CRTC1    | protein_coding |
| ENSG00000105711 | SCN1B    | protein_coding |
| ENSG00000105967 | TFEC     | protein_coding |
| ENSG00000106351 | AGFG2    | protein_coding |
| ENSG00000106976 | DNM1     | protein_coding |
| ENSG00000107130 | NCS1     | protein_coding |
| ENSG00000108091 | CCDC6    | protein_coding |
| ENSG00000108551 | RASD1    | protein_coding |
| ENSG00000109501 | WFS1     | protein_coding |
| ENSG00000112038 | OPRM1    | protein_coding |
| ENSG00000112319 | EYA4     | protein_coding |
| ENSG00000112378 | PERP     | protein_coding |
| ENSG00000112796 | ENPP5    | protein_coding |
| ENSG00000113296 | THBS4    | protein_coding |
| ENSG00000113494 | PRLR     | protein_coding |
| ENSG00000114626 | ABTB1    | protein_coding |
| ENSG00000114812 | VIPR1    | protein_coding |
| ENSG00000115009 | CCL20    | protein_coding |
| ENSG00000115295 | CLIP4    | protein_coding |
| ENSG00000115363 | EVA1A    | protein_coding |
| ENSG00000115594 | IL1R1    | protein_coding |
| ENSG00000115604 | IL18R1   | protein_coding |
| ENSG00000115648 | MLPH     | protein_coding |
| ENSG00000115687 | PASK     | protein_coding |

|                 |         |                               |
|-----------------|---------|-------------------------------|
| ENSG00000115718 | PROC    | protein_coding                |
| ENSG00000116096 | SPR     | protein_coding                |
| ENSG00000116337 | AMPD2   | protein_coding                |
| ENSG00000116661 | FBXO2   | protein_coding                |
| ENSG00000116701 | NCF2    | protein_coding                |
| ENSG00000117016 | RIMS3   | protein_coding                |
| ENSG00000117594 | HSD11B1 | protein_coding                |
| ENSG00000117595 | IRF6    | protein_coding                |
| ENSG00000118515 | SGK1    | protein_coding                |
| ENSG00000118785 | SPP1    | protein_coding                |
| ENSG00000119227 | PIGZ    | protein_coding                |
| ENSG00000120049 | KCNIP2  | protein_coding                |
| ENSG00000120306 | CYSTM1  | protein_coding                |
| ENSG00000120337 | TNFSF18 | protein_coding                |
| ENSG00000120729 | MYOT    | protein_coding                |
| ENSG00000120949 | TNFRSF8 | protein_coding                |
| ENSG00000121316 | PLBD1   | protein_coding                |
| ENSG00000121335 | PRB2    | protein_coding                |
| ENSG00000121742 | GJB6    | protein_coding                |
| ENSG00000122035 | RASL11A | protein_coding                |
| ENSG00000122966 | CIT     | protein_coding                |
| ENSG00000123496 | IL13RA2 | protein_coding                |
| ENSG00000124103 | FAM209A | protein_coding                |
| ENSG00000124145 | SDC4    | protein_coding                |
| ENSG00000124249 | KCNK15  | protein_coding                |
| ENSG00000125148 | MT2A    | protein_coding                |
| ENSG00000125637 | PSD4    | protein_coding                |
| ENSG00000126467 | TSKS    | protein_coding                |
| ENSG00000126583 | PRKCG   | protein_coding                |
| ENSG00000126767 | ELK1    | protein_coding                |
| ENSG00000127083 | OMD     | protein_coding                |
| ENSG00000127838 | PNKD    | protein_coding                |
| ENSG00000127951 | FGL2    | protein_coding                |
| ENSG00000128536 | CDHR3   | protein_coding                |
| ENSG00000129226 | CD68    | protein_coding                |
| ENSG00000130598 | TNNI2   | protein_coding                |
| ENSG00000130653 | PNPLA7  | protein_coding                |
| ENSG00000130755 | GMFG    | protein_coding                |
| ENSG00000130775 | THEMIS2 | protein_coding                |
| ENSG00000131042 | LILRB2  | protein_coding                |
| ENSG00000131401 | NAPSB   | transcribed_unprocessed_pseud |
| ENSG00000131724 | IL13RA1 | protein_coding                |
| ENSG00000131979 | GCH1    | protein_coding                |
| ENSG00000132429 | POPDC3  | protein_coding                |
| ENSG00000132840 | BHMT2   | protein_coding                |
| ENSG00000133048 | CHI3L1  | protein_coding                |

|                 |            |                |
|-----------------|------------|----------------|
| ENSG00000133863 | TEX15      | protein_coding |
| ENSG00000134020 | PEBP4      | protein_coding |
| ENSG00000134042 | MRO        | protein_coding |
| ENSG00000134107 | BHLHE40    | protein_coding |
| ENSG00000134245 | WNT2B      | protein_coding |
| ENSG00000134508 | CABLES1    | protein_coding |
| ENSG00000134640 | MTNR1B     | protein_coding |
| ENSG00000135312 | HTR1B      | protein_coding |
| ENSG00000135378 | PRRG4      | protein_coding |
| ENSG00000135709 | KIAA0513   | protein_coding |
| ENSG00000135740 | SLC9A5     | protein_coding |
| ENSG00000135750 | KCNK1      | protein_coding |
| ENSG00000135821 | GLUL       | protein_coding |
| ENSG00000136003 | ISCU       | protein_coding |
| ENSG00000136881 | BAAT       | protein_coding |
| ENSG00000137507 | LRRC32     | protein_coding |
| ENSG00000137857 | DUOX1      | protein_coding |
| ENSG00000137880 | GCHFR      | protein_coding |
| ENSG00000138678 | AGPAT9     | protein_coding |
| ENSG00000138744 | NAAA       | protein_coding |
| ENSG00000138798 | EGF        | protein_coding |
| ENSG00000139190 | VAMP1      | protein_coding |
| ENSG00000139626 | ITGB7      | protein_coding |
| ENSG00000140519 | RHCG       | protein_coding |
| ENSG00000140563 | MCTP2      | protein_coding |
| ENSG00000140961 | OSGIN1     | protein_coding |
| ENSG00000140992 | PDPK1      | protein_coding |
| ENSG00000141449 | GREB1L     | protein_coding |
| ENSG00000141469 | SLC14A1    | protein_coding |
| ENSG00000141750 | STAC2      | protein_coding |
| ENSG00000142910 | TINAGL1    | protein_coding |
| ENSG00000143001 | TMEM61     | protein_coding |
| ENSG00000143248 | RGS5       | protein_coding |
| ENSG00000143257 | NR1I3      | protein_coding |
| ENSG00000143819 | EPHX1      | protein_coding |
| ENSG00000143847 | PPFIA4     | protein_coding |
| ENSG00000144406 | UNC80      | protein_coding |
| ENSG00000144410 | CPO        | protein_coding |
| ENSG00000144550 | CPNE9      | protein_coding |
| ENSG00000145063 | AC062028.1 | lincRNA        |
| ENSG00000145526 | CDH18      | protein_coding |
| ENSG00000146013 | GFRA3      | protein_coding |
| ENSG00000146411 | SLC2A12    | protein_coding |
| ENSG00000147231 | CXorf57    | protein_coding |
| ENSG00000147465 | STAR       | protein_coding |
| ENSG00000147889 | CDKN2A     | protein_coding |

|                 |                  |                        |
|-----------------|------------------|------------------------|
| ENSG00000148175 | STOM             | protein_coding         |
| ENSG00000148671 | ADIRF            | protein_coding         |
| ENSG00000148935 | GAS2             | protein_coding         |
| ENSG00000149571 | KIRREL3          | protein_coding         |
| ENSG00000149573 | MPZL2            | protein_coding         |
| ENSG00000149925 | ALDOA            | protein_coding         |
| ENSG00000150782 | IL18             | protein_coding         |
| ENSG00000151062 | CACNA2D4         | protein_coding         |
| ENSG00000151360 | ALLC             | protein_coding         |
| ENSG00000151704 | KCNJ1            | protein_coding         |
| ENSG00000151882 | CCL28            | protein_coding         |
| ENSG00000152669 | CCNO             | protein_coding         |
| ENSG00000153446 | C16orf89         | protein_coding         |
| ENSG00000154027 | AK5              | protein_coding         |
| ENSG00000155629 | PIK3AP1          | protein_coding         |
| ENSG00000155719 | OTOA             | protein_coding         |
| ENSG00000156049 | GNA14            | protein_coding         |
| ENSG00000157343 | ARMC12           | protein_coding         |
| ENSG00000157617 | C2CD2            | protein_coding         |
| ENSG00000157782 | CABP1            | protein_coding         |
| ENSG00000158079 | PTPDC1           | protein_coding         |
| ENSG00000158220 | ESYT3            | protein_coding         |
| ENSG00000159189 | C1QC             | protein_coding         |
| ENSG00000159231 | CBR3             | protein_coding         |
| ENSG00000159753 | RLTPR            | protein_coding         |
| ENSG00000159871 | LYPD5            | protein_coding         |
| ENSG00000160179 | ABCG1            | protein_coding         |
| ENSG00000160183 | TMPRSS3          | protein_coding         |
| ENSG00000160678 | S100A1           | protein_coding         |
| ENSG00000160791 | CCR5             | protein_coding         |
| ENSG00000161055 | SCGB3A1          | protein_coding         |
| ENSG00000161132 | XXbac-B444P24.10 | unprocessed_pseudogene |
| ENSG00000161249 | DMKN             | protein_coding         |
| ENSG00000161955 | TNFSF13          | protein_coding         |
| ENSG00000162595 | DIRAS3           | protein_coding         |
| ENSG00000162645 | GBP2             | protein_coding         |
| ENSG00000162706 | CADM3            | protein_coding         |
| ENSG00000162913 | C1orf145         | protein_coding         |
| ENSG00000163131 | CTSS             | protein_coding         |
| ENSG00000163239 | TDRD10           | protein_coding         |
| ENSG00000163701 | IL17RE           | protein_coding         |
| ENSG00000163833 | FBXO40           | protein_coding         |
| ENSG00000164089 | ETNPPL           | protein_coding         |
| ENSG00000164100 | NDST3            | protein_coding         |
| ENSG00000164181 | ELOVL7           | protein_coding         |
| ENSG00000164236 | ANKRD33B         | protein_coding         |

|                 |             |                      |
|-----------------|-------------|----------------------|
| ENSG00000164488 | DACT2       | protein_coding       |
| ENSG00000164690 | SHH         | protein_coding       |
| ENSG00000164695 | CHMP4C      | protein_coding       |
| ENSG00000164744 | SUN3        | protein_coding       |
| ENSG00000164849 | GPR146      | protein_coding       |
| ENSG00000165071 | TMEM71      | protein_coding       |
| ENSG00000165188 | RNF183      | protein_coding       |
| ENSG00000165197 | FIGF        | protein_coding       |
| ENSG00000165370 | GPR101      | protein_coding       |
| ENSG00000165887 | ANKRD2      | protein_coding       |
| ENSG00000166073 | GPR176      | protein_coding       |
| ENSG00000166448 | TMEM130     | protein_coding       |
| ENSG00000166816 | LDHD        | protein_coding       |
| ENSG00000167037 | SGSM1       | protein_coding       |
| ENSG00000167608 | TMC4        | protein_coding       |
| ENSG00000167676 | PLIN4       | protein_coding       |
| ENSG00000167778 | SPRYD3      | protein_coding       |
| ENSG00000167779 | IGFBP6      | protein_coding       |
| ENSG00000167799 | NUDT8       | protein_coding       |
| ENSG00000167995 | BEST1       | protein_coding       |
| ENSG00000168405 | CMAHP       | unitary_pseudogene   |
| ENSG00000168418 | KCNG4       | protein_coding       |
| ENSG00000168830 | HTR1E       | protein_coding       |
| ENSG00000169006 | NTSR2       | protein_coding       |
| ENSG00000169242 | EFNA1       | protein_coding       |
| ENSG00000169413 | RNASE6      | protein_coding       |
| ENSG00000169499 | PLEKHA2     | protein_coding       |
| ENSG00000170323 | FABP4       | protein_coding       |
| ENSG00000170561 | IRX2        | protein_coding       |
| ENSG00000171217 | CLDN20      | protein_coding       |
| ENSG00000171502 | COL24A1     | protein_coding       |
| ENSG00000171860 | C3AR1       | protein_coding       |
| ENSG00000171889 | MIR31HG     | sense_overlapping    |
| ENSG00000172216 | CEBPB       | protein_coding       |
| ENSG00000172243 | CLEC7A      | protein_coding       |
| ENSG00000172250 | SERHL       | processed_transcript |
| ENSG00000172568 | FNDC9       | protein_coding       |
| ENSG00000172824 | CES4A       | protein_coding       |
| ENSG00000172965 | MIR4435-1HG | lincRNA              |
| ENSG00000172987 | HPSE2       | protein_coding       |
| ENSG00000173267 | SNCG        | protein_coding       |
| ENSG00000173369 | C1QB        | protein_coding       |
| ENSG00000173811 | CCDC13-AS1  | antisense            |
| ENSG00000173826 | KCNH6       | protein_coding       |
| ENSG00000173898 | SPTBN2      | protein_coding       |
| ENSG00000174332 | GLIS1       | protein_coding       |

|                 |           |                                    |
|-----------------|-----------|------------------------------------|
| ENSG00000174370 | C11orf45  | protein_coding                     |
| ENSG00000174791 | RIN1      | protein_coding                     |
| ENSG00000175164 | ABO       | protein_coding                     |
| ENSG00000175894 | TSPEAR    | protein_coding                     |
| ENSG00000175984 | DENND2C   | protein_coding                     |
| ENSG00000176046 | NUPR1     | protein_coding                     |
| ENSG00000176399 | DMRTA1    | protein_coding                     |
| ENSG00000176595 | KBTBD11   | protein_coding                     |
| ENSG00000177106 | EPS8L2    | protein_coding                     |
| ENSG00000177669 | MBOAT4    | protein_coding                     |
| ENSG00000178222 | RNF212    | protein_coding                     |
| ENSG00000178343 | SHISA3    | protein_coding                     |
| ENSG00000178645 | C10orf53  | protein_coding                     |
| ENSG00000179083 | FAM133A   | protein_coding                     |
| ENSG00000179397 | C1orf101  | protein_coding                     |
| ENSG00000179546 | HTR1D     | protein_coding                     |
| ENSG00000180061 | TMEM150B  | protein_coding                     |
| ENSG00000180139 | ACTA2-AS1 | antisense                          |
| ENSG00000180229 | HERC2P3   | transcribed_unprocessed_pseudogene |
| ENSG00000180332 | KCTD4     | protein_coding                     |
| ENSG00000180353 | HCLS1     | protein_coding                     |
| ENSG00000180525 | PRR26     | protein_coding                     |
| ENSG00000180758 | GPR157    | protein_coding                     |
| ENSG00000180777 | ANKRD30B  | protein_coding                     |
| ENSG00000181019 | NQO1      | protein_coding                     |
| ENSG00000181541 | MAB21L2   | protein_coding                     |
| ENSG00000182255 | KCNA4     | protein_coding                     |
| ENSG00000182326 | C1S       | protein_coding                     |
| ENSG00000182487 | NCF1B     | transcribed_unprocessed_pseudogene |
| ENSG00000182508 | LHFPL1    | protein_coding                     |
| ENSG00000183486 | MX2       | protein_coding                     |
| ENSG00000183696 | UPP1      | protein_coding                     |
| ENSG00000183760 | PAPL      | protein_coding                     |
| ENSG00000183826 | BTBD9     | protein_coding                     |
| ENSG00000183935 | HTR7P1    | transcribed_processed_pseudogene   |
| ENSG00000184205 | TSPYL2    | protein_coding                     |
| ENSG00000184293 | CLECL1    | protein_coding                     |
| ENSG00000184454 | NCMAP     | protein_coding                     |
| ENSG00000185201 | IFITM2    | protein_coding                     |
| ENSG00000185215 | TNFAIP2   | protein_coding                     |
| ENSG00000185436 | IFNLR1    | protein_coding                     |
| ENSG00000186074 | CD300LF   | protein_coding                     |
| ENSG00000186326 | RGS9BP    | protein_coding                     |
| ENSG00000186777 | ZNF732    | protein_coding                     |
| ENSG00000186862 | PDZD7     | protein_coding                     |
| ENSG00000187037 | GPR141    | protein_coding                     |

|                 |              |                      |
|-----------------|--------------|----------------------|
| ENSG00000187045 | TMPRSS6      | protein_coding       |
| ENSG00000187950 | OVCH1        | protein_coding       |
| ENSG00000188095 | MESP2        | protein_coding       |
| ENSG00000188266 | HYKK         | protein_coding       |
| ENSG00000188277 | C15orf62     | protein_coding       |
| ENSG00000188385 | JAKMIP3      | protein_coding       |
| ENSG00000188783 | PRELP        | protein_coding       |
| ENSG00000188817 | SNTN         | protein_coding       |
| ENSG00000189001 | SBSN         | protein_coding       |
| ENSG00000189058 | APOD         | protein_coding       |
| ENSG00000189171 | S100A13      | protein_coding       |
| ENSG00000189280 | GJB5         | protein_coding       |
| ENSG00000189292 | FAM150B      | protein_coding       |
| ENSG00000196091 | MYBPC1       | protein_coding       |
| ENSG00000196109 | ZNF676       | protein_coding       |
| ENSG00000196126 | HLA-DRB1     | protein_coding       |
| ENSG00000196273 | LINC00523    | lincRNA              |
| ENSG00000196735 | HLA-DQA1     | protein_coding       |
| ENSG00000197360 | ZNF98        | protein_coding       |
| ENSG00000197444 | OGDHL        | protein_coding       |
| ENSG00000197503 | LINC00477    | lincRNA              |
| ENSG00000197520 | FAM177B      | protein_coding       |
| ENSG00000197837 | HIST4H4      | protein_coding       |
| ENSG00000197934 | CYR1-AS1     | antisense            |
| ENSG00000197956 | S100A6       | protein_coding       |
| ENSG00000198168 | SVIP         | protein_coding       |
| ENSG00000198734 | F5           | protein_coding       |
| ENSG00000198832 | SELM         | protein_coding       |
| ENSG00000198959 | TGM2         | protein_coding       |
| ENSG00000199363 | SNORA63      | snoRNA               |
| ENSG00000203280 | CTA-221G9.12 | antisense            |
| ENSG00000203705 | TATDN3       | protein_coding       |
| ENSG00000203709 | C1orf132     | lincRNA              |
| ENSG00000203710 | CR1          | protein_coding       |
| ENSG00000203722 | RAET1G       | protein_coding       |
| ENSG00000203797 | DDO          | protein_coding       |
| ENSG00000203999 | LINC01270    | lincRNA              |
| ENSG00000204071 | TCEAL6       | protein_coding       |
| ENSG00000204252 | HLA-DOA      | protein_coding       |
| ENSG00000204257 | HLA-DMA      | protein_coding       |
| ENSG00000204287 | HLA-DRA      | protein_coding       |
| ENSG00000204396 | VWA7         | protein_coding       |
| ENSG00000204642 | HLA-F        | protein_coding       |
| ENSG00000205038 | PKHD1L1      | protein_coding       |
| ENSG00000205744 | DENND1C      | protein_coding       |
| ENSG00000206195 | DUXAP8       | processed_transcript |



|                 |                 |                                    |
|-----------------|-----------------|------------------------------------|
| ENSG00000206559 | ZCWPW2          | protein_coding                     |
| ENSG00000208839 | SNORA35         | snoRNA                             |
| ENSG00000213465 | ARL2            | protein_coding                     |
| ENSG00000213642 | RP11-561N12.5   | processed_pseudogene               |
| ENSG00000213672 | NCKIPSD         | protein_coding                     |
| ENSG00000213889 | PPM1N           | protein_coding                     |
| ENSG00000214575 | CPEB1           | protein_coding                     |
| ENSG00000214652 | ZNF727          | protein_coding                     |
| ENSG00000215559 | ANKRD20A11P     | transcribed_unprocessed_pseudogene |
| ENSG00000215915 | ATAD3C          | protein_coding                     |
| ENSG00000216316 | RP3-354N19.3    | processed_pseudogene               |
| ENSG00000216863 | LY86-AS1        | antisense                          |
| ENSG00000218424 | NDUFS5P1        | processed_pseudogene               |
| ENSG00000221947 | XKR9            | protein_coding                     |
| ENSG00000221986 | MYBPHL          | protein_coding                     |
| ENSG00000222041 | LINC00152       | lincRNA                            |
| ENSG00000223485 | RP11-417E7.1    | lincRNA                            |
| ENSG00000223558 | TRIM60P17       | processed_pseudogene               |
| ENSG00000223559 | RP11-700P18.1   | processed_pseudogene               |
| ENSG00000223564 | CYP4F32P        | unprocessed_pseudogene             |
| ENSG00000223865 | HLA-DPB1        | protein_coding                     |
| ENSG00000224116 | INHBA-AS1       | antisense                          |
| ENSG00000224222 | RP11-262I2.2    | lincRNA                            |
| ENSG00000224271 | RP11-191L9.4    | lincRNA                            |
| ENSG00000224441 | AC068831.3      | antisense                          |
| ENSG00000224577 | LINC01117       | lincRNA                            |
| ENSG00000224668 | IPO8P1          | processed_pseudogene               |
| ENSG00000224689 | ZNF812          | protein_coding                     |
| ENSG00000224796 | RPL32P1         | processed_pseudogene               |
| ENSG00000224950 | RP5-1086K13.1   | lincRNA                            |
| ENSG00000225110 | LLOXNC01-16G2.1 | unprocessed_pseudogene             |
| ENSG00000225140 | RP11-809C18.3   | antisense                          |
| ENSG00000225285 | RP4-758J18.10   | lincRNA                            |
| ENSG00000225331 | AP001055.6      | lincRNA                            |
| ENSG00000225342 | AC079630.4      | antisense                          |
| ENSG00000225518 | RP11-396C23.2   | lincRNA                            |
| ENSG00000225778 | PROSER2-AS1     | antisense                          |
| ENSG00000226287 | TMEM191A        | processed_transcript               |
| ENSG00000226578 | RP11-258F22.1   | lincRNA                            |
| ENSG00000226581 | RP11-340I6.8    | lincRNA                            |
| ENSG00000226608 | FTLP3           | processed_pseudogene               |
| ENSG00000226650 | KIF4B           | protein_coding                     |
| ENSG00000227265 | AC073464.4      | processed_pseudogene               |
| ENSG00000227392 | HPN-AS1         | antisense                          |
| ENSG00000227455 | RP11-300M24.1   | lincRNA                            |
| ENSG00000227646 | STEAP2-AS1      | processed_transcript               |

|                 |               |                                    |
|-----------------|---------------|------------------------------------|
| ENSG00000227835 | CARM1P1       | transcribed_unprocessed_pseudogene |
| ENSG00000227848 | SUCLA2-AS1    | antisense                          |
| ENSG00000227855 | DPY19L2P3     | transcribed_unprocessed_pseudogene |
| ENSG00000227868 | C1orf234      | protein_coding                     |
| ENSG00000227910 | RP11-73B2.6   | transcribed_processed_pseudogene   |
| ENSG00000228203 | RNF144A-AS1   | processed_transcript               |
| ENSG00000228232 | GAPDHP1       | processed_pseudogene               |
| ENSG00000228314 | CYP4F29P      | transcribed_unprocessed_pseudogene |
| ENSG00000228541 | AC093159.1    | lincRNA                            |
| ENSG00000228704 | RP11-138M12.1 | lincRNA                            |
| ENSG00000229081 | LINC01165     | antisense                          |
| ENSG00000229089 | ANKRD20A8P    | transcribed_unprocessed_pseudogene |
| ENSG00000229116 | RP11-20J15.3  | lincRNA                            |
| ENSG00000229321 | AC008269.2    | lincRNA                            |
| ENSG00000229427 | ANKRD26P4     | processed_pseudogene               |
| ENSG00000229570 | GAPDHP58      | processed_pseudogene               |
| ENSG00000230317 | LINC01284     | lincRNA                            |
| ENSG00000230965 | SNX18P13      | processed_pseudogene               |
| ENSG00000231133 | HAR1B         | lincRNA                            |
| ENSG00000231367 | AC016995.3    | lincRNA                            |
| ENSG00000231389 | HLA-DPA1      | protein_coding                     |
| ENSG00000231616 | RP11-575L7.4  | antisense                          |
| ENSG00000231654 | RPS6KA2-AS1   | antisense                          |
| ENSG00000231683 | RP1-27K12.2   | lincRNA                            |
| ENSG00000231721 | LINC-PINT     | antisense                          |
| ENSG00000231826 | AC016735.2    | lincRNA                            |
| ENSG00000231995 | RP11-111F5.2  | processed_pseudogene               |
| ENSG00000232006 | AC005537.2    | lincRNA                            |
| ENSG00000232352 | SEMA3B-AS1    | antisense                          |
| ENSG00000232386 | RP11-66B24.2  | lincRNA                            |
| ENSG00000232406 | RP11-234K24.3 | antisense                          |
| ENSG00000232514 | RP11-329A14.2 | processed_pseudogene               |
| ENSG00000232656 | IDI2-AS1      | antisense                          |
| ENSG00000232706 | NUTM2HP       | unprocessed_pseudogene             |
| ENSG00000232837 | AF064858.7    | lincRNA                            |
| ENSG00000233423 | RP4-736H5.3   | lincRNA                            |
| ENSG00000233435 | AGGF1P2       | processed_pseudogene               |
| ENSG00000233593 | RP4-665J23.1  | lincRNA                            |
| ENSG00000233684 | AC079779.6    | lincRNA                            |
| ENSG00000233725 | LINC00284     | lincRNA                            |
| ENSG00000233820 | RP11-535M15.2 | transcribed_processed_pseudogene   |
| ENSG00000233878 | AC073133.1    | lincRNA                            |
| ENSG00000233885 | YEATS2-AS1    | antisense                          |
| ENSG00000234056 | LINC00463     | lincRNA                            |
| ENSG00000234076 | TPRG1-AS1     | lincRNA                            |
| ENSG00000234231 | AC093616.4    | unprocessed_pseudogene             |

|                 |               |                                    |
|-----------------|---------------|------------------------------------|
| ENSG00000234336 | JAZF1-AS1     | antisense                          |
| ENSG00000234602 | MCIDAS        | protein_coding                     |
| ENSG00000234840 | LINC01239     | lincRNA                            |
| ENSG00000235098 | ANKRD65       | protein_coding                     |
| ENSG00000235310 | GXYLT1P6      | processed_pseudogene               |
| ENSG00000235595 | GAPDHP23      | processed_pseudogene               |
| ENSG00000235831 | BHLHE40-AS1   | antisense                          |
| ENSG00000235884 | LINC00941     | lincRNA                            |
| ENSG00000236240 | GPC5-IT1      | sense_intronic                     |
| ENSG00000236451 | AC067956.1    | lincRNA                            |
| ENSG00000236700 | LINC01010     | lincRNA                            |
| ENSG00000236882 | LINC01554     | lincRNA                            |
| ENSG00000237595 | RP11-112L6.3  | lincRNA                            |
| ENSG00000237879 | LINC00398     | lincRNA                            |
| ENSG00000237949 | LINC00844     | lincRNA                            |
| ENSG00000240038 | AMY2B         | protein_coding                     |
| ENSG00000240271 | RP11-200A13.2 | processed_pseudogene               |
| ENSG00000240405 | LINC01212     | lincRNA                            |
| ENSG00000240521 | RP11-680B3.2  | antisense                          |
| ENSG00000240912 | RP11-274J15.2 | processed_pseudogene               |
| ENSG00000241231 | RP11-275H4.1  | lincRNA                            |
| ENSG00000241489 | IDS           | protein_coding                     |
| ENSG00000241717 | VWFP1         | transcribed_unprocessed_pseudogene |
| ENSG00000241878 | PISD          | protein_coding                     |
| ENSG00000241956 | CTC-340A15.2  | antisense                          |
| ENSG00000241973 | PI4KA         | protein_coding                     |
| ENSG00000242103 | RP11-10G15.4  | processed_pseudogene               |
| ENSG00000242574 | HLA-DMB       | protein_coding                     |
| ENSG00000242768 | RP11-556G22.1 | processed_pseudogene               |
| ENSG00000243480 | AMY2A         | protein_coding                     |
| ENSG00000243806 | RPL7P18       | processed_pseudogene               |
| ENSG00000244089 | HMGB1P30      | processed_pseudogene               |
| ENSG00000245848 | CEBPA         | protein_coding                     |
| ENSG00000245958 | RP11-33B1.1   | transcribed_unprocessed_pseudogene |
| ENSG00000246174 | KCTD21-AS1    | antisense                          |
| ENSG00000246225 | RP11-17A1.3   | antisense                          |
| ENSG00000246331 | RP11-77I22.2  | lincRNA                            |
| ENSG00000246430 | LINC00968     | lincRNA                            |
| ENSG00000246448 | RP13-578N3.3  | antisense                          |
| ENSG00000247011 | RP11-700H6.1  | lincRNA                            |
| ENSG00000247157 | LINC01252     | lincRNA                            |
| ENSG00000247287 | RP11-902B17.1 | antisense                          |
| ENSG00000248283 | CCNL2P1       | processed_pseudogene               |
| ENSG00000248466 | RP11-640B6.1  | processed_pseudogene               |
| ENSG00000248698 | LINC01085     | lincRNA                            |
| ENSG00000248994 | RP11-259O2.1  | lincRNA                            |

|                 |                |                                    |
|-----------------|----------------|------------------------------------|
| ENSG00000249006 | RP11-317B7.2   | processed_pseudogene               |
| ENSG00000249577 | CTD-2195M15.1  | processed_pseudogene               |
| ENSG00000249604 | RP11-286E11.2  | antisense                          |
| ENSG00000249781 | CTD-2143L24.1  | lincRNA                            |
| ENSG00000249961 | CCDC79         | protein_coding                     |
| ENSG00000249996 | RP11-359P5.1   | antisense                          |
| ENSG00000250060 | RP11-332J15.2  | lincRNA                            |
| ENSG00000250125 | RP11-707A18.1  | lincRNA                            |
| ENSG00000250293 | CRYZP2         | processed_pseudogene               |
| ENSG00000250770 | RP5-1063M23.1  | lincRNA                            |
| ENSG00000250878 | METTL21EP      | transcribed_unprocessed_pseudogene |
| ENSG00000251165 | F11-AS1        | antisense                          |
| ENSG00000251365 | RP11-332J15.3  | lincRNA                            |
| ENSG00000251372 | LINC00499      | lincRNA                            |
| ENSG00000251429 | RP11-597D13.7  | transcribed_processed_pseudogene   |
| ENSG00000251556 | RP11-118M9.3   | antisense                          |
| ENSG00000253394 | LINC00534      | lincRNA                            |
| ENSG00000253521 | HPYR1          | lincRNA                            |
| ENSG00000253647 | CTD-2270F17.1  | antisense                          |
| ENSG00000253693 | CTC-535M15.2   | lincRNA                            |
| ENSG00000253946 | CTC-425K20.1   | processed_pseudogene               |
| ENSG00000253973 | RP11-467K18.2  | antisense                          |
| ENSG00000254211 | LINC01485      | lincRNA                            |
| ENSG00000254241 | RP11-946L20.1  | processed_pseudogene               |
| ENSG00000254507 | RP11-481A20.10 | transcribed_processed_pseudogene   |
| ENSG00000254781 | GVINP2         | processed_pseudogene               |
| ENSG00000254921 | RP11-236J17.6  | antisense                          |
| ENSG00000255020 | AF131216.5     | antisense                          |
| ENSG00000255120 | OVOL1-AS1      | antisense                          |
| ENSG00000255136 | CTD-2562J17.4  | lincRNA                            |
| ENSG00000255190 | TRIM51DP       | processed_pseudogene               |
| ENSG00000255292 | AP002884.2     | protein_coding                     |
| ENSG00000255460 | ZDHHC20P3      | processed_pseudogene               |
| ENSG00000255621 | RP11-377D9.3   | lincRNA                            |
| ENSG00000256050 | RP11-982M15.6  | lincRNA                            |
| ENSG00000256980 | KHDC1L         | protein_coding                     |
| ENSG00000257913 | RP11-386G11.5  | antisense                          |
| ENSG00000258122 | RP11-61A14.1   | antisense                          |
| ENSG00000258404 | RP11-1029J19.5 | lincRNA                            |
| ENSG00000258414 | RP11-356O9.1   | lincRNA                            |
| ENSG00000258472 | RP11-192H23.4  | protein_coding                     |
| ENSG00000258736 | RP11-982M15.7  | lincRNA                            |
| ENSG00000259017 | RP11-561B11.6  | lincRNA                            |
| ENSG00000259460 | RP11-128A17.1  | antisense                          |
| ENSG00000259583 | RP11-66B24.4   | antisense                          |
| ENSG00000259744 | RP11-138H8.6   | sense_intronic                     |

|                 |               |                               |
|-----------------|---------------|-------------------------------|
| ENSG00000259803 | SLC22A31      | protein_coding                |
| ENSG00000259848 | AC097374.2    | transcribed_unprocessed_pseud |
| ENSG00000260186 | RP11-481J2.2  | lincRNA                       |
| ENSG00000260274 | RP11-817O13.8 | lincRNA                       |
| ENSG00000260418 | RP3-406A7.7   | lincRNA                       |
| ENSG00000260439 | LMF1-AS1      | antisense                     |
| ENSG00000260515 | CTD-2199O4.3  | lincRNA                       |
| ENSG00000260549 | MT1L          | unitary_pseudogene            |
| ENSG00000260599 | CTC-457E21.1  | sense_intronic                |
| ENSG00000260725 | AC005307.1    | lincRNA                       |
| ENSG00000260782 | RP11-480G7.2  | processed_pseudogene          |
| ENSG00000260896 | RP11-314O13.1 | lincRNA                       |
| ENSG00000261033 | RP11-209D14.2 | antisense                     |
| ENSG00000261114 | RP11-325K4.2  | sense_intronic                |
| ENSG00000261340 | RP11-215H22.1 | lincRNA                       |
| ENSG00000261399 | LA16c-329F2.1 | antisense                     |
| ENSG00000261617 | RP11-243A14.1 | lincRNA                       |
| ENSG00000261710 | RP11-953B20.1 | lincRNA                       |
| ENSG00000264617 | AC144838.3    | unprocessed_pseudogene        |
| ENSG00000264707 | L3MBTL4-AS1   | lincRNA                       |
| ENSG00000265118 | CTD-2370N5.3  | protein_coding                |
| ENSG00000265972 | TXNIP         | protein_coding                |
| ENSG00000266248 | CTC-525D6.2   | antisense                     |
| ENSG00000266733 | TBC1D29       | protein_coding                |
| ENSG00000267014 | LINC01532     | lincRNA                       |
| ENSG00000267191 | RP11-15A1.2   | antisense                     |
| ENSG00000267243 | AC005307.3    | lincRNA                       |
| ENSG00000268055 | AC067969.2    | antisense                     |
| ENSG00000268272 | VN1R78P       | unprocessed_pseudogene        |
| ENSG00000269067 | ZNF728        | protein_coding                |
| ENSG00000269345 | VN1R85P       | unprocessed_pseudogene        |
| ENSG00000269935 | RP11-482M8.3  | antisense                     |
| ENSG00000269956 | MKNK1-AS1     | antisense                     |
| ENSG00000270969 | CTD-2355J17.2 | processed_pseudogene          |
| ENSG00000271204 | RP11-138A9.1  | lincRNA                       |
| ENSG00000271434 | RP13-238F13.3 | processed_transcript          |
| ENSG00000271858 | CYB561D2      | antisense                     |
| ENSG00000271947 | RP11-439M11.1 | lincRNA                       |
| ENSG00000272002 | RP11-557L19.1 | lincRNA                       |
| ENSG00000272112 | CTB-113P19.5  | lincRNA                       |
| ENSG00000272356 | RP5-1112D6.8  | antisense                     |
| ENSG00000272573 | MUSTN1        | protein_coding                |
| ENSG00000272647 | GS1-259H13.10 | protein_coding                |
| ENSG00000272808 | RP11-66B24.7  | processed_transcript          |
| ENSG00000273024 | INTS4P2       | transcribed_unprocessed_pseud |
| ENSG00000273100 | RP11-302L19.3 | lincRNA                       |

|                 |               |                                |
|-----------------|---------------|--------------------------------|
| ENSG00000273305 | RP11-440D17.4 | lincRNA                        |
| ENSG00000273654 | CTB-52I2.4    | transcribed_processed_pseudoge |
| ENSG00000274001 | RP11-5G9.5    | sense_intronic                 |
| ENSG00000274002 | RP11-66N24.6  | lincRNA                        |
| ENSG00000274292 | RP11-347I19.7 | lincRNA                        |
| ENSG00000275149 | RP11-427J23.1 | lincRNA                        |
| ENSG00000275160 | RP11-187C18.3 | processed_pseudogene           |
| ENSG00000275350 | RP11-329N22.2 | processed_pseudogene           |
| ENSG00000275759 | RP11-131L12.3 | lincRNA                        |
| ENSG00000276462 | BX255923.3    | lincRNA                        |
| ENSG00000276934 | RP11-231E4.5  | sense_intronic                 |
| ENSG00000277440 | RP11-295D4.5  | sense_intronic                 |
| ENSG00000277449 | CEBPB-AS1     | antisense                      |
| ENSG00000277587 | CTD-3116E22.8 | lincRNA                        |
| ENSG00000277734 | TRAC          | TR_C_gene                      |
| ENSG00000277895 | RP11-114F3.4  | antisense                      |
| ENSG00000278445 | RP11-255P5.3  | lincRNA                        |
| ENSG00000278703 | RP11-706P11.2 | lincRNA                        |
| ENSG00000279042 | RP11-805F19.3 | TEC                            |
| ENSG00000279137 | RP11-205K6.3  | TEC                            |
| ENSG00000279191 | RP11-803D5.1  | TEC                            |
| ENSG00000279205 | RP11-632P5.1  | TEC                            |
| ENSG00000279455 | RP11-495K9.10 | TEC                            |
| ENSG00000279692 | RP11-1055B8.1 | TEC                            |
| ENSG00000279720 | bP-2171C21.6  | processed_pseudogene           |
| ENSG00000279853 | RP5-844F9.1   | TEC                            |
| ENSG00000280399 | RP11-80P20.3  | TEC                            |
| ENSG00000280439 | RP4-568B10.1  | TEC                            |
| ENSG00000280650 | KCNIP4-IT1    | lincRNA                        |
| ENSG00000280837 | CPS1-IT1      | sense_intronic                 |
| ENSG00000281883 | RP11-65B7.2   | protein_coding                 |







ogene







ogene

ogene

ene



ogene

ogene

ogene

ene

ogene

ogene

ene



ogene

ogene

ogene

ene

ene

ogene

ogene

ene
