# Supplementary material for: Identifying gene expression profiles associated with neurogenesis and inflammation in the human subependymal zone from development through aging
Source: PubMed Central journal article supplement (PMC8742079; doi:10.1038/s41598-021-03976-4), 2022-01-07
Supplement: 41598_2021_3976_MOESM4_ESM.pdf [file 41598_2021_3976_MOESM4_ESM.pdf]

|                 |              |                |
|-----------------|--------------|----------------|
| ENSG00000005001 | PRSS22       | protein_coding |
| ENSG00000007952 | NOX1         | protein_coding |
| ENSG00000018280 | SLC11A1      | protein_coding |
| ENSG00000039537 | C6           | protein_coding |
| ENSG00000047457 | CP           | protein_coding |
| ENSG00000070915 | SLC12A3      | protein_coding |
| ENSG00000075886 | TUBA3D       | protein_coding |
| ENSG00000090104 | RGS1         | protein_coding |
| ENSG00000090339 | ICAM1        | protein_coding |
| ENSG00000095917 | TPSD1        | protein_coding |
| ENSG00000096060 | FKBP5        | protein_coding |
| ENSG00000100985 | MMP9         | protein_coding |
| ENSG00000101187 | SLCO4A1      | protein_coding |
| ENSG00000101440 | ASIP         | protein_coding |
| ENSG00000102970 | CCL17        | protein_coding |
| ENSG00000103569 | AQP9         | protein_coding |
| ENSG00000104499 | GML          | protein_coding |
| ENSG00000105281 | SLC1A5       | protein_coding |
| ENSG00000105352 | CEACAM4      | protein_coding |
| ENSG00000105697 | HAMP         | protein_coding |
| ENSG00000106366 | SERPINE1     | protein_coding |
| ENSG00000106927 | AMBP         | protein_coding |
| ENSG00000108405 | P2RX1        | protein_coding |
| ENSG00000115297 | TLX2         | protein_coding |
| ENSG00000115590 | IL1R2        | protein_coding |
| ENSG00000118113 | MMP8         | protein_coding |
| ENSG00000123843 | C4BPB        | protein_coding |
| ENSG00000124343 | XG           | protein_coding |
| ENSG00000124731 | TREM1        | protein_coding |
| ENSG00000124935 | SCGB1D2      | protein_coding |
| ENSG00000124939 | SCGB2A1      | protein_coding |
| ENSG00000125144 | MT1G         | protein_coding |
| ENSG00000125538 | IL1B         | protein_coding |
| ENSG00000127507 | EMR2         | protein_coding |
| ENSG00000127530 | OR7C1        | protein_coding |
| ENSG00000132965 | ALOX5AP      | protein_coding |
| ENSG00000134240 | HMGCS2       | protein_coding |
| ENSG00000135245 | HILPDA       | protein_coding |
| ENSG00000135373 | EHF          | protein_coding |
| ENSG00000136286 | MYO1G        | protein_coding |
| ENSG00000136315 | RP11-84C10.2 | lincRNA        |
| ENSG00000137225 | CAPN11       | protein_coding |
| ENSG00000137462 | TLR2         | protein_coding |
| ENSG00000137757 | CASP5        | protein_coding |
| ENSG00000138347 | MYPN         | protein_coding |
| ENSG00000138483 | CCDC54       | protein_coding |

|                 |             |                        |
|-----------------|-------------|------------------------|
| ENSG00000142748 | FCN3        | protein_coding         |
| ENSG00000142973 | CYP4B1      | protein_coding         |
| ENSG00000143110 | C1orf162    | protein_coding         |
| ENSG00000143226 | FCGR2A      | protein_coding         |
| ENSG00000143546 | S100A8      | protein_coding         |
| ENSG00000145642 | FAM159B     | protein_coding         |
| ENSG00000147183 | CPXCR1      | protein_coding         |
| ENSG00000147689 | FAM83A      | protein_coding         |
| ENSG00000148926 | ADM         | protein_coding         |
| ENSG00000150337 | FCGR1A      | protein_coding         |
| ENSG00000151650 | VENTX       | protein_coding         |
| ENSG00000155659 | VSIG4       | protein_coding         |
| ENSG00000156194 | PPEF2       | protein_coding         |
| ENSG00000158714 | SLAMF8      | protein_coding         |
| ENSG00000160282 | FTCD        | protein_coding         |
| ENSG00000160862 | AZGP1       | protein_coding         |
| ENSG00000162006 | MSLNL       | protein_coding         |
| ENSG00000162383 | SLC1A7      | protein_coding         |
| ENSG00000163220 | S100A9      | protein_coding         |
| ENSG00000163221 | S100A12     | protein_coding         |
| ENSG00000163914 | RHO         | protein_coding         |
| ENSG00000164362 | TERT        | protein_coding         |
| ENSG00000165507 | C10orf10    | protein_coding         |
| ENSG00000166492 | FAM86GP     | unprocessed_pseudogene |
| ENSG00000166523 | CLEC4E      | protein_coding         |
| ENSG00000167208 | SNX20       | protein_coding         |
| ENSG00000167549 | CORO6       | protein_coding         |
| ENSG00000167772 | ANGPTL4     | protein_coding         |
| ENSG00000168070 | C11orf85    | protein_coding         |
| ENSG00000168126 | OR2W6P      | unprocessed_pseudogene |
| ENSG00000169385 | RNASE2      | protein_coding         |
| ENSG00000169397 | RNASE3      | protein_coding         |
| ENSG00000169507 | SLC38A11    | protein_coding         |
| ENSG00000170298 | LGALS9B     | protein_coding         |
| ENSG00000170458 | CD14        | protein_coding         |
| ENSG00000170577 | SIX2        | protein_coding         |
| ENSG00000170807 | LMOD2       | protein_coding         |
| ENSG00000171051 | FPR1        | protein_coding         |
| ENSG00000171236 | LRG1        | protein_coding         |
| ENSG00000171346 | KRT15       | protein_coding         |
| ENSG00000172538 | FAM170B     | protein_coding         |
| ENSG00000173976 | RAX2        | protein_coding         |
| ENSG00000174016 | FAM46D      | protein_coding         |
| ENSG00000174715 | RP11-79L9.2 | processed_pseudogene   |
| ENSG00000174837 | EMR1        | protein_coding         |
| ENSG00000175315 | CST6        | protein_coding         |

|                 |               |                        |
|-----------------|---------------|------------------------|
| ENSG00000176387 | HSD11B2       | protein_coding         |
| ENSG00000177575 | CD163         | protein_coding         |
| ENSG00000179593 | ALOX15B       | protein_coding         |
| ENSG00000181227 | RP4-682C21.2  | processed_pseudogene   |
| ENSG00000181433 | SAGE1         | protein_coding         |
| ENSG00000182586 | LINC00334     | lincRNA                |
| ENSG00000182854 | OR4F15        | protein_coding         |
| ENSG00000183318 | SPDYE4        | protein_coding         |
| ENSG00000184258 | CDR1          | protein_coding         |
| ENSG00000184302 | SIX6          | protein_coding         |
| ENSG00000185087 | FAM169B       | protein_coding         |
| ENSG00000185775 | SPATA31A6     | protein_coding         |
| ENSG00000186439 | TRDN          | protein_coding         |
| ENSG00000187193 | MT1X          | protein_coding         |
| ENSG00000187922 | LCN10         | protein_coding         |
| ENSG00000188101 | ALOX15P2      | unprocessed_pseudogene |
| ENSG00000188488 | SERPINA5      | protein_coding         |
| ENSG00000189143 | CLDN4         | protein_coding         |
| ENSG00000189377 | CXCL17        | protein_coding         |
| ENSG00000196136 | SERPINA3      | protein_coding         |
| ENSG00000196183 | RPS2P4        | processed_pseudogene   |
| ENSG00000196616 | ADH1B         | protein_coding         |
| ENSG00000197249 | SERPINA1      | protein_coding         |
| ENSG00000197251 | LINC00336     | lincRNA                |
| ENSG00000197272 | IL27          | protein_coding         |
| ENSG00000197658 | SLC22A24      | protein_coding         |
| ENSG00000198685 | LINC01565     | lincRNA                |
| ENSG00000203286 | Metazoa_SRP   | misc_RNA               |
| ENSG00000203496 | RP11-291L22.4 | lincRNA                |
| ENSG00000203729 | LINC00272     | lincRNA                |
| ENSG00000203786 | KPRP          | protein_coding         |
| ENSG00000204020 | LIPN          | protein_coding         |
| ENSG00000204188 | GGNBP1        | unitary_pseudogene     |
| ENSG00000204434 | POTEKP        | unprocessed_pseudogene |
| ENSG00000204460 | AC079586.1    | lincRNA                |
| ENSG00000204577 | LILRB3        | protein_coding         |
| ENSG00000204936 | CD177         | protein_coding         |
| ENSG00000205358 | MT1H          | protein_coding         |
| ENSG00000205364 | MT1M          | protein_coding         |
| ENSG00000205622 | AF064858.6    | lincRNA                |
| ENSG00000205628 | LINC01446     | lincRNA                |
| ENSG00000206181 | TCEB3B        | protein_coding         |
| ENSG00000211752 | TRBV27        | TR_V_gene              |
| ENSG00000212933 | KRTAP12-4     | protein_coding         |
| ENSG00000213014 | VN2R17P       | processed_pseudogene   |
| ENSG00000213065 | RP3-431P23.2  | processed_pseudogene   |

|                 |               |                                    |
|-----------------|---------------|------------------------------------|
| ENSG00000213088 | ACKR1         | protein_coding                     |
| ENSG00000213302 | RP11-560I19.2 | processed_pseudogene               |
| ENSG00000213549 | AC005077.8    | processed_pseudogene               |
| ENSG00000213740 | SERBP1P1      | processed_pseudogene               |
| ENSG00000213862 | CTD-2270N23.1 | processed_pseudogene               |
| ENSG00000213997 | PGAM1P7       | processed_pseudogene               |
| ENSG00000215284 | RP11-198M15.1 | processed_pseudogene               |
| ENSG00000217929 | CICP18        | processed_pseudogene               |
| ENSG00000218227 | RP11-889L3.1  | processed_pseudogene               |
| ENSG00000218265 | RPS4XP7       | processed_pseudogene               |
| ENSG00000218347 | HNRNPA1P1     | processed_pseudogene               |
| ENSG00000219253 | RPS6P7        | processed_pseudogene               |
| ENSG00000221102 | SNORA11B      | snoRNA                             |
| ENSG00000221864 | KRTAP12-2     | protein_coding                     |
| ENSG00000223504 | RP11-542F9.1  | lincRNA                            |
| ENSG00000223542 | RP1-283K11.3  | antisense                          |
| ENSG00000223795 | RP11-473E2.2  | lincRNA                            |
| ENSG00000224273 | AC005077.7    | unprocessed_pseudogene             |
| ENSG00000224458 | GUSBP6        | transcribed_unprocessed_pseudogene |
| ENSG00000224594 | RPL29P19      | processed_pseudogene               |
| ENSG00000224723 | GUSBP10       | unprocessed_pseudogene             |
| ENSG00000224771 | ATP2B2-IT2    | sense_intronic                     |
| ENSG00000224776 | RP11-361A21.1 | processed_pseudogene               |
| ENSG00000224863 | LINC01398     | lincRNA                            |
| ENSG00000224884 | AC034187.2    | lincRNA                            |
| ENSG00000224904 | RP5-934G17.6  | processed_pseudogene               |
| ENSG00000224911 | AC015936.3    | antisense                          |
| ENSG00000224931 | AC152010.1    | unprocessed_pseudogene             |
| ENSG00000225656 | RP5-858B6.1   | lincRNA                            |
| ENSG00000225726 | AC007000.10   | processed_pseudogene               |
| ENSG00000225798 | AC025918.2    | antisense                          |
| ENSG00000226005 | RP11-464C19.3 | lincRNA                            |
| ENSG00000226134 | RP11-120E13.1 | lincRNA                            |
| ENSG00000226277 | AC105393.2    | lincRNA                            |
| ENSG00000226332 | RP11-157P1.4  | antisense                          |
| ENSG00000226349 | RP11-145A3.2  | sense_intronic                     |
| ENSG00000226668 | RP11-526D8.7  | transcribed_unprocessed_pseudogene |
| ENSG00000226823 | SUGT1P        | unprocessed_pseudogene             |
| ENSG00000226875 | ZNF877P       | unprocessed_pseudogene             |
| ENSG00000226995 | LINC00658     | lincRNA                            |
| ENSG00000227038 | AC005077.12   | transcribed_unprocessed_pseudogene |
| ENSG00000227061 | AC079779.7    | antisense                          |
| ENSG00000227225 | MTND1P14      | unprocessed_pseudogene             |
| ENSG00000227632 | AC018804.6    | unprocessed_pseudogene             |
| ENSG00000227695 | DNMBP-AS1     | antisense                          |
| ENSG00000227726 | AP001271.3    | sense_intronic                     |

|                 |               |                                    |
|-----------------|---------------|------------------------------------|
| ENSG00000227764 | RP11-354K1.1  | lincRNA                            |
| ENSG00000227779 | GS1-164F24.1  | processed_pseudogene               |
| ENSG00000227887 | RPS26P13      | processed_pseudogene               |
| ENSG00000227947 | RP11-543D5.1  | lincRNA                            |
| ENSG00000227954 | TARID         | antisense                          |
| ENSG00000228067 | RP11-61J19.3  | lincRNA                            |
| ENSG00000228683 | RP11-31E13.2  | lincRNA                            |
| ENSG00000228863 | RP11-404F10.2 | antisense                          |
| ENSG00000228877 | RP11-473E2.4  | lincRNA                            |
| ENSG00000228963 | OR7E93P       | unprocessed_pseudogene             |
| ENSG00000228983 | AC025627.7    | transcribed_unprocessed_pseudogene |
| ENSG00000229186 | ADAM1A        | unitary_pseudogene                 |
| ENSG00000229241 | PNPT1P1       | processed_pseudogene               |
| ENSG00000229331 | GK-IT1        | sense_intronic                     |
| ENSG00000229389 | CTD-2022H16.1 | lincRNA                            |
| ENSG00000229511 | GAS2L1P1      | processed_pseudogene               |
| ENSG00000229569 | RP11-481G8.2  | lincRNA                            |
| ENSG00000229707 | SKP1P3        | processed_pseudogene               |
| ENSG00000229817 | RP11-78H18.2  | processed_pseudogene               |
| ENSG00000229899 | AC084290.2    | processed_pseudogene               |
| ENSG00000230053 | RP11-76N22.1  | processed_pseudogene               |
| ENSG00000230267 | HERC2P4       | transcribed_unprocessed_pseudogene |
| ENSG00000230479 | AP000695.6    | antisense                          |
| ENSG00000230507 | RPL7AP8       | processed_pseudogene               |
| ENSG00000230781 | RP1-215K18.4  | unitary_pseudogene                 |
| ENSG00000230793 | SMARCE1P5     | processed_pseudogene               |
| ENSG00000230804 | C2orf27AP3    | unprocessed_pseudogene             |
| ENSG00000230882 | AC005077.14   | processed_pseudogene               |
| ENSG00000230899 | MAGEA8-AS1    | antisense                          |
| ENSG00000231128 | RP5-1073O3.2  | antisense                          |
| ENSG00000231184 | FAM58DP       | processed_pseudogene               |
| ENSG00000231246 | RP5-965F6.2   | lincRNA                            |
| ENSG00000231324 | AP000696.2    | lincRNA                            |
| ENSG00000231359 | AC072052.7    | processed_pseudogene               |
| ENSG00000231390 | SNX18P8       | unprocessed_pseudogene             |
| ENSG00000231612 | RP11-522M21.3 | antisense                          |
| ENSG00000231621 | AC013264.2    | antisense                          |
| ENSG00000231628 | RP3-355L5.4   | antisense                          |
| ENSG00000231638 | AC011738.4    | antisense                          |
| ENSG00000231993 | EP300-AS1     | antisense                          |
| ENSG00000232015 | HSPE1P25      | processed_pseudogene               |
| ENSG00000232022 | FAAHP1        | transcribed_unprocessed_pseudogene |
| ENSG00000232166 | RP4-799P18.5  | processed_pseudogene               |
| ENSG00000232175 | RP4-659I19.1  | processed_pseudogene               |
| ENSG00000232400 | RAD17P1       | processed_pseudogene               |
| ENSG00000232679 | RP11-400N13.3 | lincRNA                            |

|                 |               |                                    |
|-----------------|---------------|------------------------------------|
| ENSG00000232841 | AC098592.8    | processed_pseudogene               |
| ENSG00000232936 | RP11-80H5.2   | antisense                          |
| ENSG00000234537 | RP11-100G15.7 | unprocessed_pseudogene             |
| ENSG00000235052 | RP1-150O5.3   | lincRNA                            |
| ENSG00000235097 | LINC00330     | lincRNA                            |
| ENSG00000235204 | RP11-121A14.2 | antisense                          |
| ENSG00000235297 | FAUP1         | processed_pseudogene               |
| ENSG00000235304 | LINC01281     | lincRNA                            |
| ENSG00000235335 | AC016723.4    | antisense                          |
| ENSG00000235371 | RP4-764D2.1   | processed_pseudogene               |
| ENSG00000235535 | RP11-532N4.2  | antisense                          |
| ENSG00000235623 | OR7E110P      | unprocessed_pseudogene             |
| ENSG00000235641 | LINC00484     | lincRNA                            |
| ENSG00000235663 | SAPCD1-AS1    | antisense                          |
| ENSG00000236116 | AC064853.2    | sense_intronic                     |
| ENSG00000236146 | RP11-65J3.6   | processed_pseudogene               |
| ENSG00000236152 | MRPS36P1      | processed_pseudogene               |
| ENSG00000236358 | RP5-827C21.2  | antisense                          |
| ENSG00000236496 | GPS2P1        | processed_pseudogene               |
| ENSG00000236511 | LINC01231     | lincRNA                            |
| ENSG00000236739 | CLIC4P1       | processed_pseudogene               |
| ENSG00000236975 | RP5-1065P14.2 | lincRNA                            |
| ENSG00000237153 | RP11-132E11.2 | lincRNA                            |
| ENSG00000237268 | RP13-492C18.2 | transcribed_unprocessed_pseudogene |
| ENSG00000237322 | RPL7L1P10     | processed_pseudogene               |
| ENSG00000237484 | AP000476.1    | lincRNA                            |
| ENSG00000237580 | GCSHP3        | processed_pseudogene               |
| ENSG00000237951 | PPIL1P1       | processed_pseudogene               |
| ENSG00000238005 | RP11-443B7.1  | lincRNA                            |
| ENSG00000238039 | AF011889.2    | lincRNA                            |
| ENSG00000238042 | RP11-815M8.1  | lincRNA                            |
| ENSG00000238059 | HSPE1P21      | processed_pseudogene               |
| ENSG00000238180 | AC017079.4    | processed_pseudogene               |
| ENSG00000239272 | RPL21P10      | processed_pseudogene               |
| ENSG00000239333 | RN7SL658P     | misc_RNA                           |
| ENSG00000239593 | RP11-477J21.6 | antisense                          |
| ENSG00000239600 | AP000797.2    | processed_pseudogene               |
| ENSG00000240014 | RN7SL254P     | misc_RNA                           |
| ENSG00000240639 | RN7SL666P     | misc_RNA                           |
| ENSG00000240963 | RP11-518L10.5 | antisense                          |
| ENSG00000241911 | TRBVB         | TR_V_pseudogene                    |
| ENSG00000242012 | RP11-338L18.1 | lincRNA                            |
| ENSG00000242272 | AK2P2         | processed_pseudogene               |
| ENSG00000242445 | RPL7AP11      | processed_pseudogene               |
| ENSG00000242860 | RN7SL180P     | misc_RNA                           |
| ENSG00000242971 | RN7SL233P     | misc_RNA                           |

|                 |               |                                  |
|-----------------|---------------|----------------------------------|
| ENSG00000243207 | PPAN-P2RY11   | protein_coding                   |
| ENSG00000243469 | RPL7P51       | processed_pseudogene             |
| ENSG00000243509 | TNFRSF6B      | protein_coding                   |
| ENSG00000243566 | UPK3B         | protein_coding                   |
| ENSG00000243914 | RPL5P14       | processed_pseudogene             |
| ENSG00000243988 | RPS24P17      | processed_pseudogene             |
| ENSG00000244003 | RN7SL143P     | misc_RNA                         |
| ENSG00000244056 | RN7SL417P     | misc_RNA                         |
| ENSG00000244171 | PBX2P1        | processed_pseudogene             |
| ENSG00000244259 | AP000797.1    | processed_pseudogene             |
| ENSG00000244289 | RPS3AP35      | processed_pseudogene             |
| ENSG00000244306 | LINC01296     | transcribed_processed_pseudogene |
| ENSG00000244482 | LILRA6        | protein_coding                   |
| ENSG00000244578 | LINC01391     | lincRNA                          |
| ENSG00000244671 | RN7SL280P     | misc_RNA                         |
| ENSG00000244752 | CRYBB2        | protein_coding                   |
| ENSG00000246082 | NUDT16P1      | unitary_pseudogene               |
| ENSG00000247867 | CTD-2530H12.1 | antisense                        |
| ENSG00000248229 | RP11-366M4.12 | processed_pseudogene             |
| ENSG00000248302 | BNIP3P41      | transcribed_processed_pseudogene |
| ENSG00000248514 | CTC-338M12.1  | antisense                        |
| ENSG00000248525 | CTD-2001E22.1 | sense_overlapping                |
| ENSG00000248624 | RP11-5N11.2   | sense_intronic                   |
| ENSG00000248954 | RP11-304F15.4 | lincRNA                          |
| ENSG00000249307 | LINC01088     | antisense                        |
| ENSG00000249478 | CTB-49A3.5    | antisense                        |
| ENSG00000249513 | RP11-404I7.1  | lincRNA                          |
| ENSG00000249734 | RP11-332J15.1 | lincRNA                          |
| ENSG00000249833 | CCDC37-AS1    | antisense                        |
| ENSG00000249966 | CTD-2194D22.1 | antisense                        |
| ENSG00000250162 | CSNK1A1P3     | processed_pseudogene             |
| ENSG00000250230 | RP11-855O10.2 | lincRNA                          |
| ENSG00000250254 | PTTG2         | protein_coding                   |
| ENSG00000250400 | LINC00977     | lincRNA                          |
| ENSG00000250712 | RP11-366M4.14 | processed_pseudogene             |
| ENSG00000250929 | LINC01181     | antisense                        |
| ENSG00000250989 | RP11-392E22.5 | processed_pseudogene             |
| ENSG00000251139 | RP11-701P16.2 | antisense                        |
| ENSG00000251203 | RP11-14I17.1  | processed_pseudogene             |
| ENSG00000252794 | RN7SKP60      | misc_RNA                         |
| ENSG00000253293 | HOXA10        | protein_coding                   |
| ENSG00000253349 | COX6B1P6      | processed_pseudogene             |
| ENSG00000253421 | ZNHIT1P1      | processed_pseudogene             |
| ENSG00000253506 | NACA2         | protein_coding                   |
| ENSG00000254041 | RP11-574O7.1  | antisense                        |
| ENSG00000254872 | RP13-870H17.3 | lincRNA                          |

|                 |               |                                    |
|-----------------|---------------|------------------------------------|
| ENSG00000255004 | RP1-68D18.3   | antisense                          |
| ENSG00000255192 | NANOGP8       | protein_coding                     |
| ENSG00000255232 | RP11-438N5.4  | processed_pseudogene               |
| ENSG00000255250 | CTD-2005H7.2  | lincRNA                            |
| ENSG00000255293 | RP11-787P24.1 | processed_pseudogene               |
| ENSG00000255334 | RP11-708L7.6  | sense_intronic                     |
| ENSG00000255369 | RP11-740D6.3  | processed_pseudogene               |
| ENSG00000255397 | AC022182.2    | processed_pseudogene               |
| ENSG00000255400 | RP13-631K18.5 | lincRNA                            |
| ENSG00000255440 | RP11-632K5.2  | sense_intronic                     |
| ENSG00000255505 | RP11-485O14.1 | processed_pseudogene               |
| ENSG00000255986 | MT1JP         | transcribed_unprocessed_pseudogene |
| ENSG00000256226 | RP11-582E3.2  | lincRNA                            |
| ENSG00000256443 | RP11-794G24.1 | lincRNA                            |
| ENSG00000256953 | RP11-6B19.2   | lincRNA                            |
| ENSG00000256955 | RP11-417L19.2 | lincRNA                            |
| ENSG00000257342 | RP11-571M6.7  | antisense                          |
| ENSG00000257622 | RP11-44N21.4  | processed_transcript               |
| ENSG00000257904 | RP11-269C4.2  | antisense                          |
| ENSG00000258048 | RP11-530C5.1  | lincRNA                            |
| ENSG00000258227 | CLEC5A        | protein_coding                     |
| ENSG00000258558 | RP11-159L20.2 | antisense                          |
| ENSG00000258646 | RP11-950C14.3 | antisense                          |
| ENSG00000258710 | LINC01193     | lincRNA                            |
| ENSG00000258909 | RP11-164C12.2 | lincRNA                            |
| ENSG00000258942 | RP11-255G12.2 | lincRNA                            |
| ENSG00000258967 | HMG1P3        | processed_pseudogene               |
| ENSG00000259023 | LINC00524     | lincRNA                            |
| ENSG00000259113 | RP11-406H23.2 | lincRNA                            |
| ENSG00000259208 | RP11-621H8.1  | processed_pseudogene               |
| ENSG00000259361 | LINC00927     | lincRNA                            |
| ENSG00000259414 | HERC2P7       | unprocessed_pseudogene             |
| ENSG00000259465 | AHCYP7        | processed_pseudogene               |
| ENSG00000259493 | RP11-621H8.2  | processed_pseudogene               |
| ENSG00000259592 | PRELID1P4     | processed_pseudogene               |
| ENSG00000259600 | RP11-925D8.3  | processed_pseudogene               |
| ENSG00000259616 | RP11-507B12.2 | lincRNA                            |
| ENSG00000259683 | RP11-182J1.14 | unprocessed_pseudogene             |
| ENSG00000259685 | CTD-2315E11.1 | lincRNA                            |
| ENSG00000259843 | RP11-429P3.3  | antisense                          |
| ENSG00000259906 | RP11-932O9.4  | lincRNA                            |
| ENSG00000260062 | GOLGA2P11     | transcribed_unprocessed_pseudogene |
| ENSG00000260156 | RP11-394B2.6  | antisense                          |
| ENSG00000260653 | RP11-114G11.5 | lincRNA                            |
| ENSG00000260683 | CTD-2076M15.1 | lincRNA                            |
| ENSG00000260848 | CTD-2009A10.1 | lincRNA                            |



|                 |               |                        |
|-----------------|---------------|------------------------|
| ENSG00000260861 | RP4-576H24.4  | protein_coding         |
| ENSG00000260868 | RP11-394I13.1 | lincRNA                |
| ENSG00000260939 | RP11-467J12.3 | processed_pseudogene   |
| ENSG00000261020 | RP11-744K17.1 | lincRNA                |
| ENSG00000261208 | RP11-452D12.1 | processed_pseudogene   |
| ENSG00000261431 | RP4-616B8.4   | antisense              |
| ENSG00000261613 | RP11-20I23.13 | antisense              |
| ENSG00000261744 | RP11-21B21.4  | antisense              |
| ENSG00000261904 | RP11-109M19.3 | unprocessed_pseudogene |
| ENSG00000262151 | RP11-876N24.2 | antisense              |
| ENSG00000262319 | CTC-457L16.2  | antisense              |
| ENSG00000262560 | RP11-296A16.1 | protein_coding         |
| ENSG00000262678 | RP5-1050D4.4  | antisense              |
| ENSG00000263618 | RP11-527H14.4 | lincRNA                |
| ENSG00000263620 | RP11-599B13.6 | protein_coding         |
| ENSG00000263846 | CIAPIN1P      | processed_pseudogene   |
| ENSG00000264174 | RP11-212E8.1  | lincRNA                |
| ENSG00000264791 | CTC-304I17.2  | antisense              |
| ENSG00000265043 | RP11-728E14.3 | lincRNA                |
| ENSG00000265190 | ANXA8         | protein_coding         |
| ENSG00000265881 | PDLIM1P2      | processed_pseudogene   |
| ENSG00000266554 | LINC01443     | lincRNA                |
| ENSG00000266893 | AC005616.1    | lincRNA                |
| ENSG00000267206 | LCN6          | protein_coding         |
| ENSG00000267212 | CTD-2659N19.9 | lincRNA                |
| ENSG00000267318 | RP11-178C3.1  | protein_coding         |
| ENSG00000267412 | CTC-265F19.2  | sense_intronic         |
| ENSG00000267653 | RP1-193H18.3  | lincRNA                |
| ENSG00000267690 | LDLRAD4-AS1   | antisense              |
| ENSG00000267874 | CTD-2527I21.9 | sense_intronic         |
| ENSG00000267924 | RP11-255H23.4 | lincRNA                |
| ENSG00000268234 | FKBP4P6       | processed_pseudogene   |
| ENSG00000268500 | SIGLEC5       | protein_coding         |
| ENSG00000268531 | RP11-32B5.8   | lincRNA                |
| ENSG00000268549 | RP11-295P9.8  | antisense              |
| ENSG00000268734 | CTB-61M7.2    | lincRNA                |
| ENSG00000268738 | HSFX2         | protein_coding         |
| ENSG00000269825 | CTD-3099C6.9  | sense_intronic         |
| ENSG00000270016 | RP11-932O9.8  | antisense              |
| ENSG00000270120 | RP11-327F22.6 | sense_intronic         |
| ENSG00000270136 | MINOS1-NBL1   | protein_coding         |
| ENSG00000270164 | LINC01480     | lincRNA                |
| ENSG00000270190 | RP11-803D5.4  | lincRNA                |
| ENSG00000270614 | CTC-325H20.7  | processed_pseudogene   |
| ENSG00000270775 | AP000436.4    | processed_pseudogene   |
| ENSG00000271283 | CTC-412M14.6  | processed_pseudogene   |

|                 |                |                        |
|-----------------|----------------|------------------------|
| ENSG00000271329 | RP5-891H21.5   | processed_pseudogene   |
| ENSG00000271856 | LINC01215      | lincRNA                |
| ENSG00000272908 | RP11-121A8.1   | lincRNA                |
| ENSG00000273025 | CELF6          | protein_coding         |
| ENSG00000273160 | RP11-104L21.3  | lincRNA                |
| ENSG00000273259 | SERPINA3       | protein_coding         |
| ENSG00000273338 | RP11-386I14.4  | antisense              |
| ENSG00000273540 | RP11-133L19.3  | sense_intronic         |
| ENSG00000274080 | CTA-315H11.2   | sense_intronic         |
| ENSG00000274214 | RP11-757O6.6   | processed_pseudogene   |
| ENSG00000274515 | CTD-2026K11.5  | antisense              |
| ENSG00000275465 | RP11-569G13.3  | protein_coding         |
| ENSG00000275718 | CCL15          | protein_coding         |
| ENSG00000275830 | RP11-403A3.3   | lincRNA                |
| ENSG00000275954 | TBC1D3F        | protein_coding         |
| ENSG00000276047 | Metazoa_SRP    | misc_RNA               |
| ENSG00000276269 | RP11-403A3.2   | lincRNA                |
| ENSG00000276362 | RP11-241M13.2  | unprocessed_pseudogene |
| ENSG00000277708 | PGBD4P2        | unprocessed_pseudogene |
| ENSG00000277941 | MIAT_exon5_1   | misc_RNA               |
| ENSG00000278001 | RP11-157L3.11  | processed_pseudogene   |
| ENSG00000278212 | MAFIP          | unprocessed_pseudogene |
| ENSG00000278456 | RP11-66B24.9   | antisense              |
| ENSG00000278599 | TBC1D3E        | protein_coding         |
| ENSG00000278631 | RP11-71B7.1    | processed_pseudogene   |
| ENSG00000278920 | RP3-412A9.17   | sense_overlapping      |
| ENSG00000279365 | KB-176G8.1     | TEC                    |
| ENSG00000279387 | CTC-525D6.3    | TEC                    |
| ENSG00000279431 | RP11-218M11.7  | TEC                    |
| ENSG00000279530 | AC092881.1     | protein_coding         |
| ENSG00000279568 | RP11-20I23.5   | TEC                    |
| ENSG00000279844 | RP11-20F18.1   | TEC                    |
| ENSG00000279878 | RP11-286N22.16 | TEC                    |
| ENSG00000279881 | RP11-513O13.1  | TEC                    |
| ENSG00000279949 | RP11-10A14.9   | lincRNA                |
| ENSG00000279994 | RP11-312A15.2  | TEC                    |
| ENSG00000280029 | CH17-140K24.2  | antisense              |
| ENSG00000280160 | RP11-196G11.3  | TEC                    |
| ENSG00000280260 | AC017028.10    | protein_coding         |
| ENSG00000280423 | RP11-299J5.1   | TEC                    |
| ENSG00000281007 | AL158147.2     | protein_coding         |
